# Supplementary material
Source: PubMed Central journal article supplement (PMC6464089)
Supplement: NIHMS82376-supplement-SI.pdf [file NIHMS82376-supplement-SI.pdf]

# Application of Targeted Molecular and Material Property Optimization to Bacterial Attachment-Resistant (Meth)acrylate Polymers

Kevin Adlington,<sup>†</sup> Nam T. Nguyen,<sup>†,‡</sup> Elizabeth Eaves,<sup>†,‡</sup> Jing Yang,<sup>§</sup> Chien-Yi Chang,<sup>§,||</sup> Jianing Li,<sup>†,‡</sup> Alexandra L. Gower,<sup>†</sup> Amy Stimpson,<sup>†</sup> Daniel G. Anderson,<sup>⊥</sup> Robert Langer,<sup>⊥</sup> Martyn C. Davies,<sup>#</sup> Andrew L. Hook,<sup>#</sup> Paul Williams,<sup>§</sup> Morgan R. Alexander,<sup>#</sup> and Derek J. Irvine<sup>\*,†</sup>

<sup>†</sup>Department of Chemical and Environmental Engineering, Faculty of Engineering, <sup>‡</sup>School of Chemistry, <sup>§</sup>Centre for Biomolecular Sciences and School of Life Sciences, School of Chemistry, and <sup>#</sup>Laboratory of Biophysics and Surface Analysis, School of Pharmacy, University of Nottingham, Nottingham, NG7 2RD, United Kingdom

<sup>⊥</sup>Department of Chemical Engineering, Institute for Medical Engineering and Science, Harvard-MIT Division of Health Sciences and Technology, David H. Koch Institute for Integrative Cancer Research, Massachusetts Institute of Technology, 500 Main Street, Cambridge, Massachusetts 02139, United States

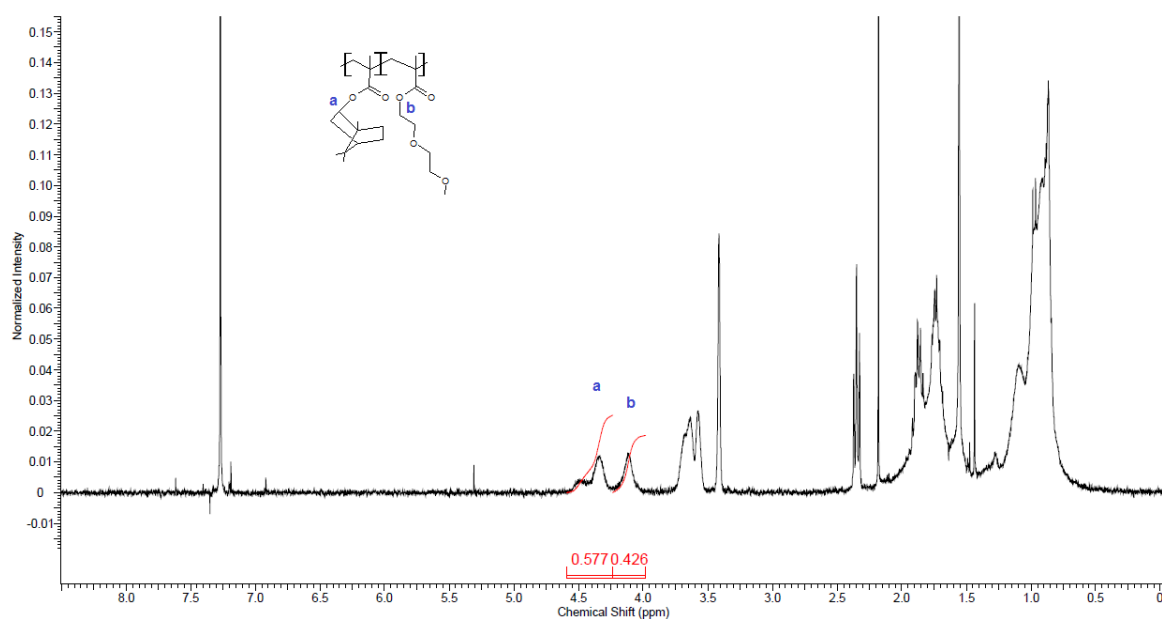

Figure S1 – <sup>1</sup>H NMR spectrum of precipitated IBMA:DEGMA 75/25 (300 MHz, CDCl<sub>3</sub>). Integral Ha = 0.577; integral 2Hb = 0.426; Copolymer ratio = 73/27.

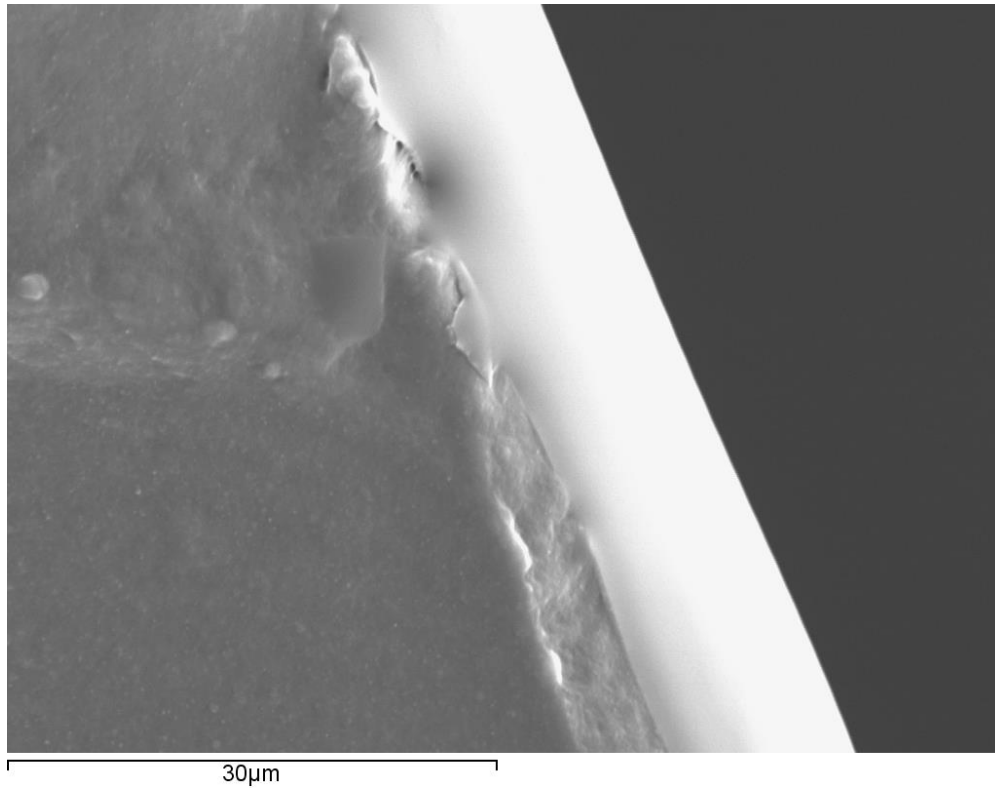

Figure S2 – An example SEM image of a PDMS coated catheter cross-section. Coating thickness was typically between 5-10 microns. For all images the coating is the light band and PDMS is the grey area.
